# Supplementary material
Source: PubMed Central journal article supplement (PMC4672832)
Supplement: pnas.1514191112.sapp.pdf [file pnas.1514191112.sapp.pdf]

**Table S1. Antibodies and reagents used for flow cytometry**

| Antigen                         | Conjugate   | Isotype                     | Clone and source             |
|---------------------------------|-------------|-----------------------------|------------------------------|
| B220                            | PerCP       | Rat IgG <sub>2a</sub> κ     | RA3-6B2, BD Pharmingen™      |
| CD19                            | Bv421       | Rat IgG <sub>2a</sub> κ     | 6D5, BioLegend               |
| CD19                            | PeCy7       | Rat IgG <sub>2a</sub> κ     | 1D3, BD Pharmingen™          |
| Flt3                            | Biotin      | Rat IgG <sub>2a</sub> κ     | A2F10, BioLegend             |
| Flt3                            | PE          | Rat IgG <sub>2a</sub> κ     | A2F10.1, BD Pharmingen™      |
| IgM                             | FITC        | Rat IgG <sub>2a</sub> κ     | R6-60.2, BD Pharmingen™      |
| IgD                             | Percp-e710  | Rat IgG <sub>2a</sub> κ     | 11-26c, eBioscience          |
| IgG1                            | Fite        | Rat IgG <sub>1</sub> κ      | A85-1, BD Pharmingen™        |
| IL-4R                           | Biotin      | Rat IgG <sub>2a</sub> κ     | mIL4R-M1, BD Pharmingen™     |
| IL-7R                           | APC         | Rat IgG <sub>2a</sub> κ     | A7R34, BioLegend             |
| CD3                             | V500        | Syr. Ham IgG <sub>2</sub> κ | 500A2, BD Horizon™           |
| CD3                             | PerCp       | Ar Ham IgG <sub>1</sub> κ   | 145-2C11, BD Pharmingen™     |
| CD4                             | PB          | Rat IgG <sub>2a</sub> κ     | RM4-5, BD Pharmingen™        |
| ICOS                            | PE          | Syr Hams IgG                | 15F9, BioLegend              |
| CD86                            | PerCp       | Rat IgG <sub>2a</sub> κ     | GL-1, BioLegend              |
| CD80                            | APC         | Ar Hams IgG <sub>2</sub> κ  | 16-10A1, BD Pharmingen™      |
| CD40                            | Percp710    | Rat IgG <sub>2a</sub> κ     | 1C10, eBioscience            |
| MHCII (I-a/I-e)                 | APCe780     | Rat IgG <sub>2b</sub> κ     | M5/114.15.2, eBioscience     |
| CD138                           | APC         | Rat IgG <sub>2a</sub> κ     | 281-2, BD Pharmingen™        |
| CD93                            | PeCy7       | Rat IgG <sub>2b</sub> κ     | AA4.1, eBioscience           |
| GL7                             | AF647       | Rat IgM κ                   | GL7, BD Pharmingen           |
| Stat6 (pY641)                   | AF647       | Ms IgG <sub>1</sub> κ       | J71-773.58.11, BD Phosflow™  |
| CXCR5                           | APC         | Rat IgG <sub>2a</sub>       | 2G8, BD Pharmingen™          |
| Bcl6                            | AF647       | Mouse IgG <sub>1</sub>      | K112-91, BD Pharmingen™      |
| CD16/CD32 FC-block              |             | Rat IgG <sub>2b</sub>       | 2.4G2, BD Pharmingen™        |
| Streptavidin                    | PE, APC     |                             | BD Pharmingen™               |
| Fixable Viability Dye (FVD)     | eFlour™ 506 |                             | eBioscience                  |
| CellTrace Violet™               | eFlour™ 780 |                             |                              |
| BD Phosflow Perm buffer IV, 10x | 405/450     |                             | Molecular Probes, invitrogen |
| BD CytoFix                      |             |                             | BD Phosflow™                 |

**Table S2. Antibodies and substrates used for Immunohistochemistry**

| Target                      | Conjugate            | Isotype                   | Product number and Source           |
|-----------------------------|----------------------|---------------------------|-------------------------------------|
| Fc-Block (CD16/32)          |                      | Rat IgG <sub>2a</sub>     | 553142, BD Pharmingen™              |
| Bcl-6                       | Alexa Fluor® 647     | Mouse IgG <sub>1</sub>    | 561525, BD Pharmingen™              |
| B220                        |                      | Rat IgG <sub>2a</sub>     | Ab64100, Abcam                      |
| Flt3                        |                      | Rat IgG <sub>2</sub>      | ab73019, Abcam                      |
| GL7                         | Alexa Fluor® 647     | Rat LOU                   | 561529, BD Pharmingen™              |
| CXCR4                       | Biotin               | Rat IgG <sub>2b</sub>     | 551968, BD Pharmingen™              |
| Streptavidin                | Alexa Fluor® 555     |                           | S 21381, Molecular Probes™          |
| Anti-Rat                    | Alexa Fluor® 488     | Goat IgG                  | A11006, Thermo Fisher Scientific    |
| Anti-rabbit                 | Biotin               | Swine F(ab') <sub>2</sub> | E0431, DAKO                         |
| ExtraVidin                  | Alkaline Phosphatase |                           | E2636, Sigma                        |
| IgM                         | Biotin               | Goat F(ab') <sub>2</sub>  | 115-066-075, Jackson Immunoresearch |
| IgG1                        | Biotin               | Goat F(ab') <sub>2</sub>  | 1072-08, SouthernBiotech            |
| VECTASTAIN ABC Kit          |                      | Goat IgG                  | PK-6105, Vector Laboratories        |
| ImmPACT™ AEC Peroxidase Kit |                      |                           | SK-4205, Vector Laboratories        |
| NucBlue™ Live Cell Stain    | Hoechst 33342        |                           | R37605, Molecular Probes™           |

**Table S3. Antibodies used for immunoglobulin ELISA**

| <b>Target</b>           | <b>ELISA</b>   | <b>Conjugate</b> | <b>Isotype</b>                               | <b>Product number and Source</b>       |
|-------------------------|----------------|------------------|----------------------------------------------|----------------------------------------|
| IgM                     | Total,<br>mBSA | Biotin           | Goat F(ab') <sub>2</sub>                     | 115-066-075 Jackson<br>Immunoresearch  |
| IgG                     |                | Biotin           | Goat F(ab') <sub>2</sub>                     | 115-066-071, Jackson<br>Immunoresearch |
| IgG1                    | mBSA           | Biotin           | Goat (γ1 chain spec)                         | 1070-08, SouthernBiotech               |
| IgG1                    | Total          | Biotin           | Goat (γ1 chain spec)                         | 1072-08, SouthernBiotech               |
| IgG2b                   | mBSA           | Biotin           | Goat (γ2β chain spec)                        | 1090-08, SouthernBiotech               |
| IgG2b                   | Total          | Biotin           | Goat F(ab') <sub>2</sub> (γ2β chain<br>spec) | 1092-08, SouthernBiotech               |
| IgG2c                   | Total,<br>mBSA | Biotin           | Goat (γ2α chain spec)                        | 1179-08, SouthernBiotech               |
| IgG3                    | mBSA           | Biotin           | Goat (γ3 chain spec)                         | 1100-08, SouthernBiotech               |
| IgG3                    | Total          | Biotin           | Goat F(ab') <sub>2</sub> (γ3 chain spec)     | 1102-08, SouthernBiotech               |
| Mouse Igs<br>ExtrAvidin | Total,<br>mBSA | Peroxidase       | Goat F(ab') <sub>2</sub>                     | 55491, MP cappel<br>E2886, Sigma       |

**Table S4. Primers used for qPCR**

| Target                 | Forward Primer              | Reverse Primer              | Manufacture     |
|------------------------|-----------------------------|-----------------------------|-----------------|
| Pax5                   | TACTCTGCACCGACGCTGAC        | GAAGAATACTGAGGGTGGCTGT      | Sigma-Aldrich   |
| Bcl6                   | CTTCCGCTACAAGGGCAAC         | CGAGTGTGGGTCTTCAGGTT        | Sigma-Aldrich   |
| XBP-1                  | GAGCAGCAAGTGGTGGATTT        | GCGTGTCTTAACTCCTGGTTC       | Sigma-Aldrich   |
| IRF4                   | GGCCCAACAAGCTAGAAAGA        | CACCAAAGCACAGAGTCACC        | Sigma-Aldrich   |
| Prdma1 (Blimp1)        | TCAAGTATGCTGCCAACAACA       | GGCATTCTTGGGAAGTGTGT        | Sigma-Aldrich   |
| IL-21                  | ACATTCATCATTGACCTCGTG       | GAATCACAGGAAGGGCATT         | Sigma-Aldrich   |
| IL-4                   | CAGAGACTCTTTCGGGCTTT        | TGATGCTCTTTAGGCTTTCCA       | Sigma-Aldrich   |
| IL-4R                  | CACTACAGGCTGATGTTCTTCG      | CGGCCTATTCATTTCATGT         | Sigma-Aldrich   |
| IL-7R                  | TGGAAGTGATGGAAGTCAAC        | TTGCAGCTTGTTAAGAGTTAGGC     | Sigma-Aldrich   |
| Common $\gamma$ -chain | TGTTGGTTGGAACGAATGC         | TCAGCCCTTTAGACACACCAC       | Sigma-Aldrich   |
| Stat6                  | AGGAGCCTCACCTGCAAAT         | CACAGCATGTTCTGGGACT         | Sigma-Aldrich   |
| GAPDH                  | Available from manufacturer | Available from manufacturer | TATAA Biocenter |
| $\gamma$ 1             | TCGAGAAGCCTGAGGAATGT        | ATAGACAGATGGGGTGTTCG        | Sigma-Aldrich   |
| Iyb                    | GCTCAGAGACAGAGCAGTGACC      | AGATCTGGGAACAAGGGCTTC       | Sigma-Aldrich   |
| $\gamma$ 2b            | CCAACCAGGAAGAGTCCAGAG       | ACAGGGATCCAGAGTTCCAAGT      | Sigma-Aldrich   |
| $\gamma$ 2a            | CTGGCAGTACCGATGCAGC         | GCCAGTTGTACCTCCACACACAG     | Sigma-Aldrich   |
| $\gamma$ 3             | AGAGTCAGCCTCAAGGAGATGAT     | CAGGGACCAAGGGATAGACAG       | Sigma-Aldrich   |
| Stat3                  | AGGAGGAGGCATTTGGAAAG        | GAACTTGGTCTTCAGGTACGG       | Sigma-Aldrich   |
| Stat6                  | AGGAGCCTCACCTGCAAAT         | CACAGCATGTTCTGGGACT         | Sigma-Aldrich   |
| IRF8                   | CAATCAGGAGGTGGATGCTT        | AGCACAGCGTAACCTCGTCT        | Sigma-Aldrich   |
| AID                    | GATAGTGCCACCTCCTGCTC        | GGTCCCAGTCTGAGATGTAGC       | Sigma-Aldrich   |

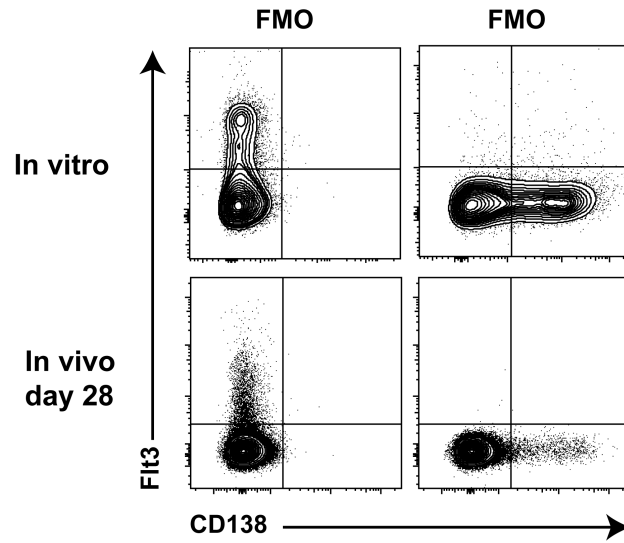

**Figure S1. Controls staining used for gating Flt3 and CD138.** FMO (fluorochrome minus one control) staining used for gating Flt3 and CD138 on B-cells after *in vitro* activation with LPS and *in vivo* at day 28 after mBSA immunization.

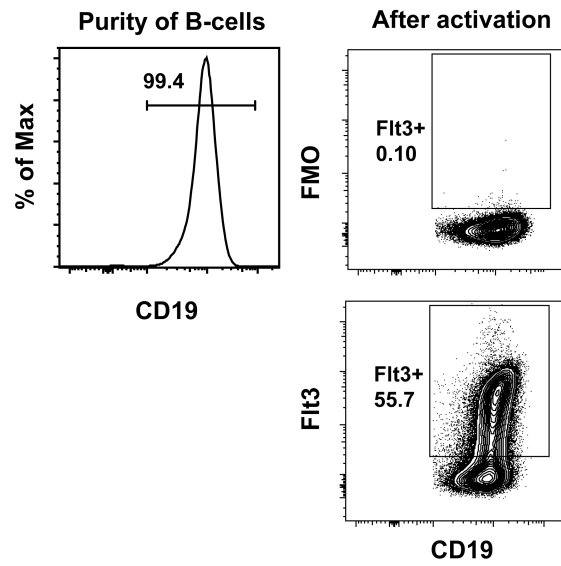

**Figure S2. Purity and expression of Flt3 on LPS stimulated B-cell.** Purity of spleen CD19+ B cells isolated by EasySep Mouse B cell Isolation Kit (Stemcell) and surface expression of Flt3 on LPS activated B cells prior to FL stimulation *in vitro*. FMO, fluorochrome minus one staining control for Flt3.

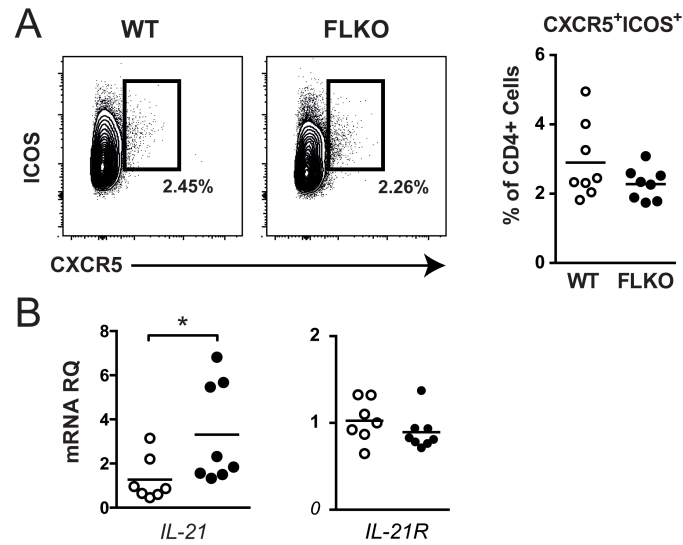

**Figure S3. Follicular T-cells in FLKO and WT mice. A)** No difference in the frequency of splenic T<sub>FH</sub> (defined as CD4<sup>+</sup>ICOS<sup>+</sup>CXCR5<sup>+</sup>) was observed between WT and FLKO mice after mBSA immunization. **B)** FLKO mice have increased expression of IL-21 compared to WT mice in the spleen after mBSA immunization. Splenic expression of the IL-21R was similar between FLKO and WT mBSA immunized mice. \* P < 0.05. Statistic analysis was performed using unpaired Student's t-test.

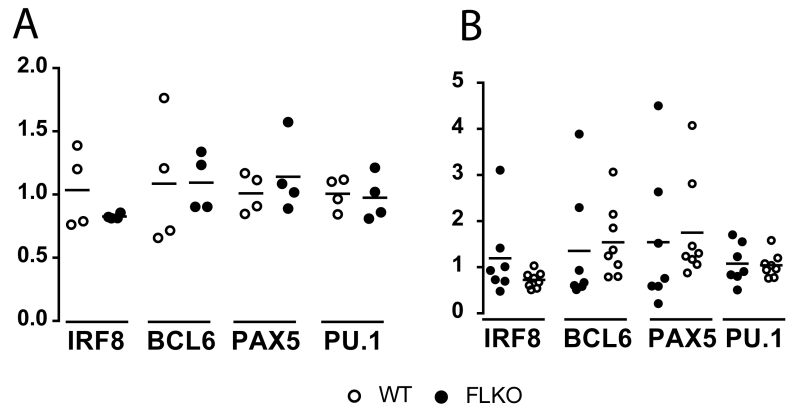

**Figure S4. Expression of genes associated with terminal B-cell differentiation in the spleen of FLKO and WT mBSA immunized mice.** Splenic gene expression of *IRF8*, *Bcl6*, *Pax5* and *Pu1* at day 14 (A) and day 28 (B) in FLKO and WT mice after mBSA immunization.



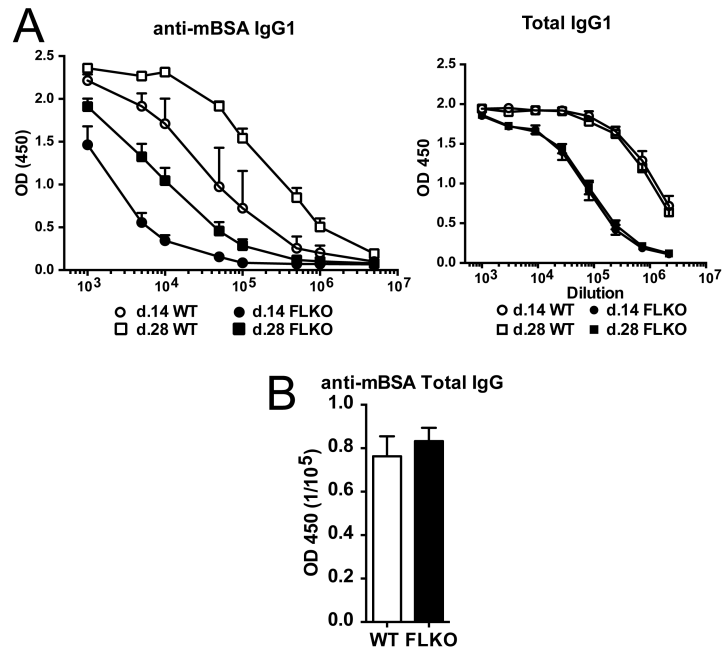

**Figure S5. Serum dilution curves for measurement of anti-mBSA and total IgG1 and levels of total anti-mBSA IgG . A)** Dilution curves used to determine the serum levels of anti-mBSA and total IgG1 at day 14 and day 28 after mBSA immunization. **B)** No differences in the serum level of total IgG directed against mBSA was found between FLKO and WT mice at day 28 (WT n = 15, FLKO n = 16)

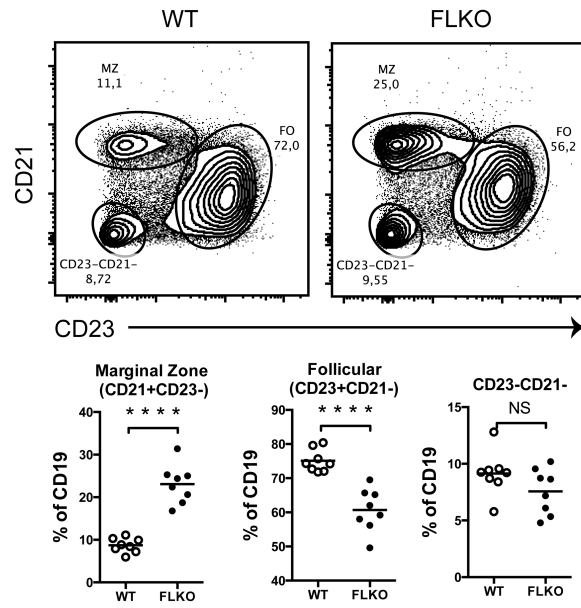

**Figure S6. Marginal Zone and follicular B-cells in FLKO and WT mice.** FLKO mice have an altered distribution of marginal zone (defined as CD21+CD23-) and follicular B-cells (defined as CD21-CD23+) compared to WT mice. Cells were gated on total CD19+ cells and analyzed in the spleen at day 28 after mBSA immunization.

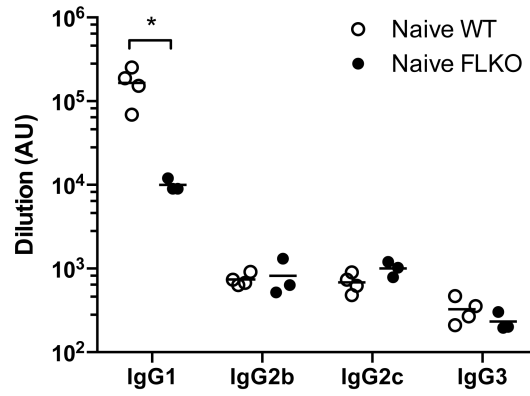

**Figure S7. Total levels of IgG subclasses in naïve WT and FLKO mice.** Measurement of total levels of IgG1, IgG2b, IgG2c and IgG3 in the serum of naïve and FLKO mice revealed a specific reduction in IgG1 also at baseline, whereas other antibody subclasses were produced at similar levels.

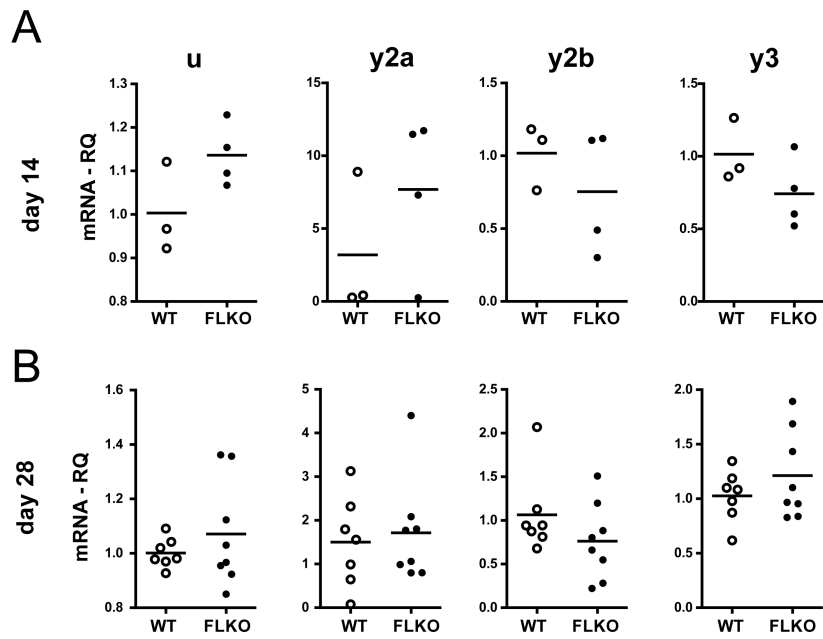

**Figure S8. Expression of GLT in the spleen of FLKO and WT mice after mBSA immunization.** Expression of GLT for IgM ( $\mu$ ), IgG2b ( $\gamma$ 2b), IgG2c ( $\gamma$ 2a) and IgG3 ( $\gamma$ 3) was evaluated in the spleen of mBSA immunized FLKO and WT mice at day 14 **(A)** and day 28 **(B)**

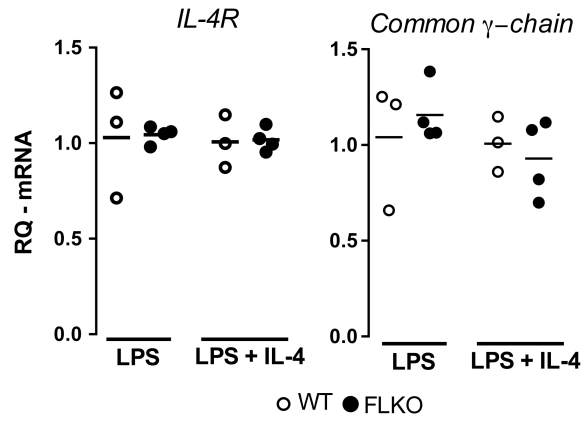

**Figure S9. Gene expression of the IL-4R and common  $\gamma$ -chain in FLKO and WT splenocytes after *in vitro* stimulation.** Gene-expression of the IL-4R and common  $\gamma$ -chain chain was detected in FLKO and WT splenocytes after *in vitro* stimulation with LPS and LPS+IL-4 for 72h.
